# Supplementary material for: Conformational behaviour of 3-methyl-4-(4-methylbenzoyl)-1-phenyl-pyrazol-5-one: a sudden story of three desmotropes
Source: Royal Society of Chemistry journal article supplement (doi:10.1039/c5ra11858a), 2015-01-01
Supplement: c5ra11858a1.pdf [file c5ra11858a1.pdf]

## Supporting Information

### Conformational behaviour of 3-methyl-4-(4-methylbenzoyl)-1-phenyl-pyrazol-5-one: a sudden story of three desmotrops

Vanya B. Kurteva,<sup>\*a</sup> Boris L. Shivachev,<sup>b</sup> Rositsa P. Nikolova,<sup>b</sup> Svetlana D. Simova,<sup>a</sup> Liudmil M. Antonov,<sup>a</sup> Lubomir A. Lubenov,<sup>a</sup> and Maria A. Petrova<sup>c</sup>

<sup>a</sup>Institute of Organic Chemistry with Centre of Phytochemistry, Bulgarian Academy of Sciences, Acad. G. Bonchev str., bl. 9, 1113 Sofia, Bulgaria; <sup>b</sup>Institute of Mineralogy and Crystallography "Acad. Ivan Kostov", Bulgarian Academy of Sciences, Acad. G. Bonchev str., bl. 107, 1113 Sofia, Bulgaria; <sup>c</sup>University of Chemical Technology and Metallurgy, Department of General and Inorganic Chemistry, 8 Kliment Ohridski blvd., 1756 Sofia, Bulgaria

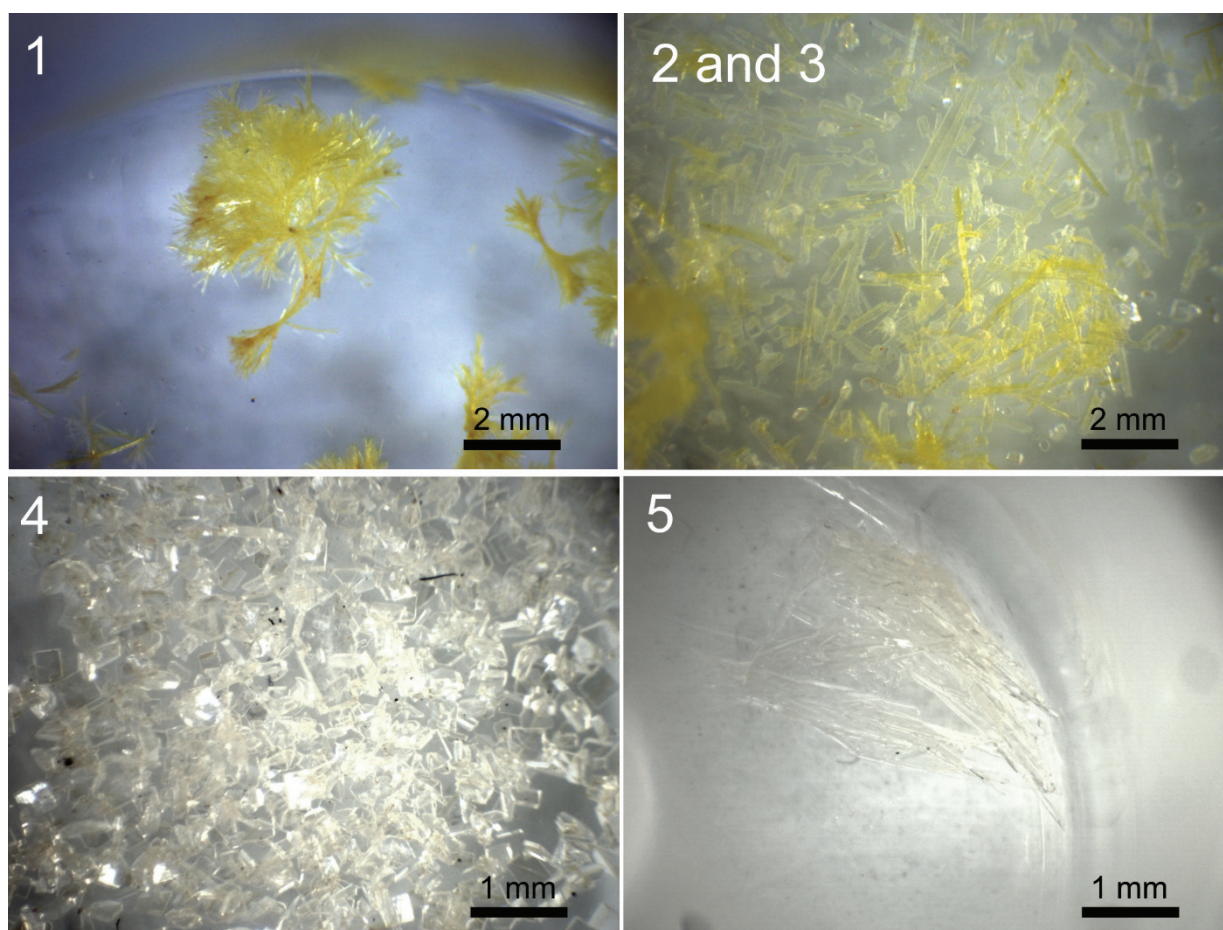

**Figure S1.** Images (optical microscopy) of the five types of crystal phases 1-5; 2 (thick pale yellow needles) and 3 (yellow needles) were grown as a mixture; observed yellowish coloration on 4 and 5 is due to the employed light source.

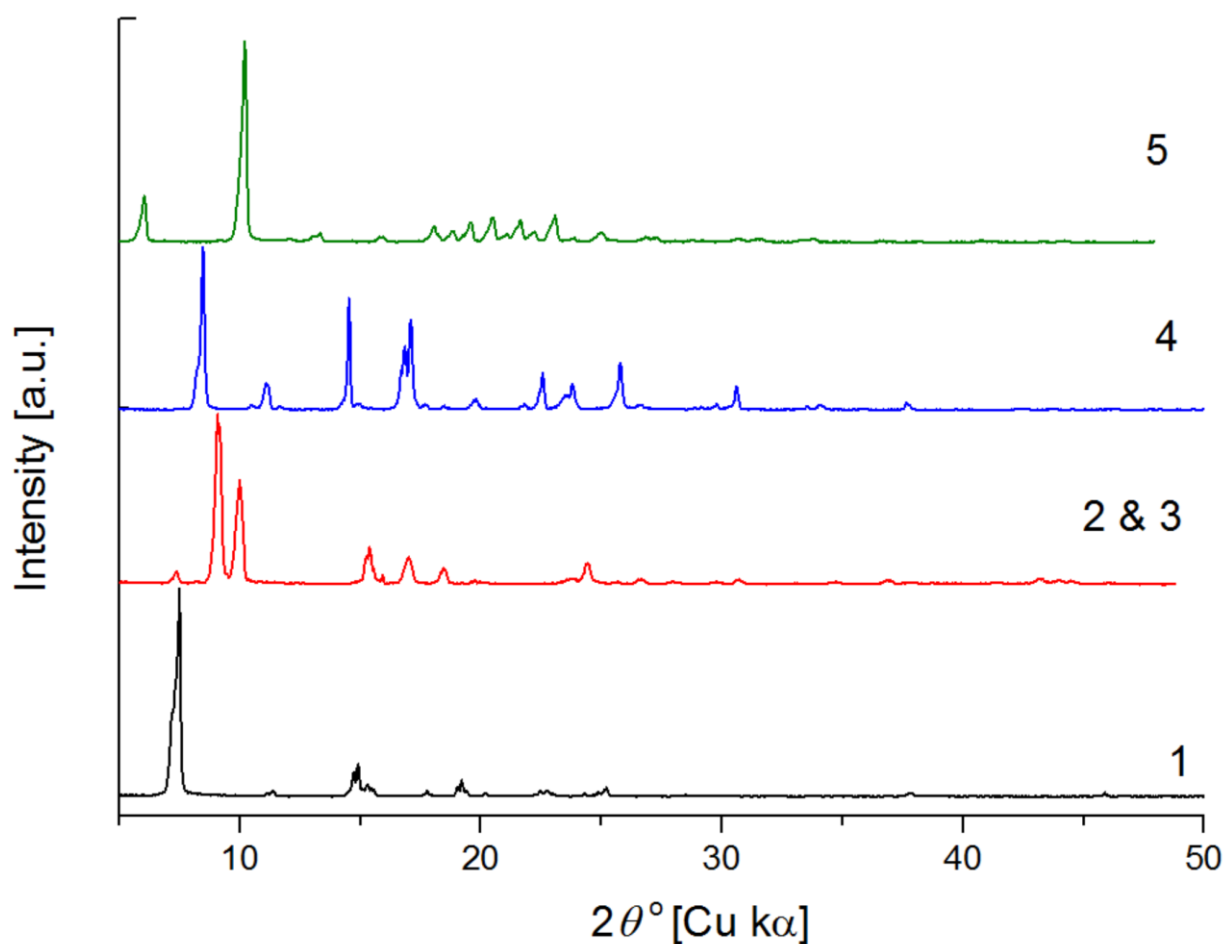

**Figure S2.** Powder XRD patterns of **1-5**. Crystal phases **2** and **3** grow as a mixture.

**Table S1.** Selected bond distances for **1 - 5** (Å).

| Bond      | Selected bond lengths, Å |          |          |            |          |
|-----------|--------------------------|----------|----------|------------|----------|
|           | <b>1</b>                 | <b>2</b> | <b>3</b> | <b>4</b>   | <b>5</b> |
| N1 – N2   | 1.3981(19)               | 1.395(3) | 1.420(6) | 1.3768(19) | 1.374(2) |
| N2 – C3   | 1.313(2)                 | 1.310(3) | 1.294(6) | 1.321(2)   | 1.326(2) |
| C3 – C4   | 1.499(2)                 | 1.427(3) | 1.425(7) | 1.387(2)   | 1.393(2) |
| C4 – C41  | 1.434(2)                 | 1.431(3) | 1.424(7) | 1.476(3)   | 1.469(3) |
| C4 – C5   | 1.410(2)                 | 1.389(3) | 1.391(8) | 1.431(3)   | 1.428(3) |
| C5 – N1   | 1.346(2)                 | 1.345(3) | 1.318(7) | 1.390(2)   | 1.385(2) |
| C5 – O5   | 1.303(2)                 | 1.311(3) | 1.301(6) | 1.2502(19) | 1.254(2) |
| C41 – O41 | 1.272(2)                 | 1.268(3) | 1.289(7) | 1.219(2)   | 1.226(2) |

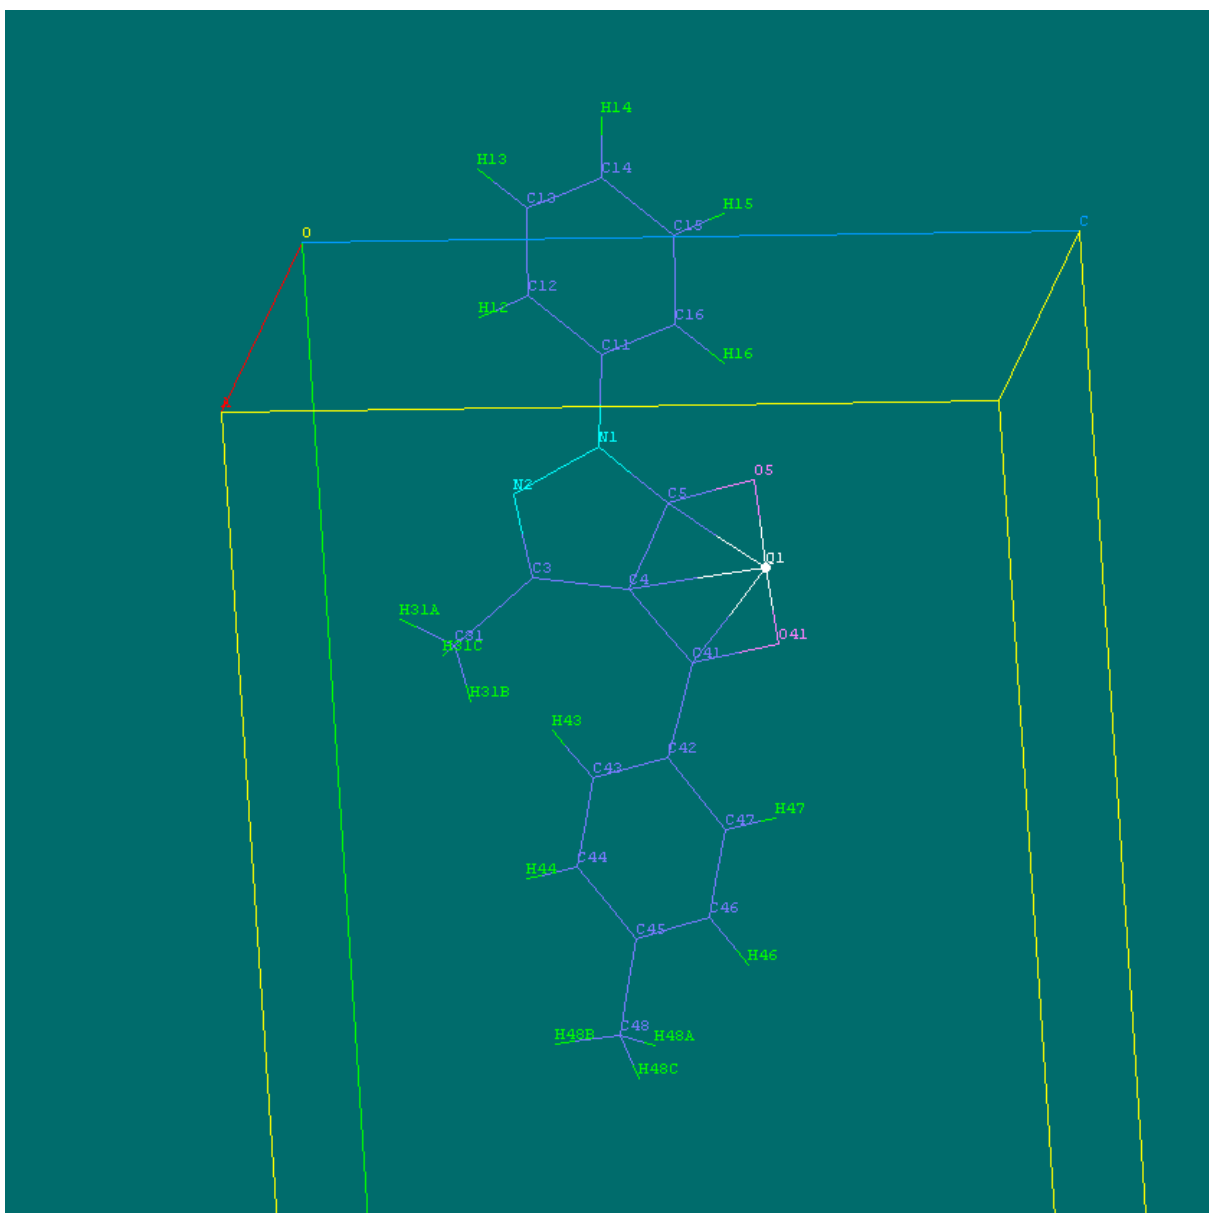

**Figure S3.** Difference Fourier map ( $F_o - F_c$ ) and observed residual electron density (Q1) nearby O41 and O5 in **3**.

**Table S2.** Hydrogen bonding interactions and geometry in **1-5** (Å, °).

|          | D-H     | d(D-H) | d(H..A) | <DHA   | d(D..A) | A                       |
|----------|---------|--------|---------|--------|---------|-------------------------|
| <b>1</b> | C16-H16 | 0.930  | 2.255   | 124.42 | 2.885   | O5                      |
|          | O5-H5   | 0.820  | 1.849   | 141.67 | 2.543   | O41                     |
|          | D-H     | d(D-H) | d(H..A) | <DHA   | d(D..A) | A                       |
| <b>2</b> | C16-H16 | 0.930  | 2.252   | 124.03 | 2.877   | O5                      |
|          | O5-H5   | 0.820  | 1.874   | 140.49 | 2.560   | O41                     |
|          | D-H     | d(D-H) | d(H..A) | <DHA   | d(D..A) | A                       |
| <b>3</b> | C16-H16 | 0.930  | 2.465   | 113.36 | 2.959   | O5                      |
|          | O5-H5   | 0.820  | 1.79    | 141.5  | 2.482   | O41                     |
|          | O41-H41 | 0.820  | 1.70    | 157.5  | 2.482   | O5                      |
|          | D-H     | d(D-H) | d(H..A) | <DHA   | d(D..A) | A                       |
| <b>4</b> | C12-H12 | 0.930  | 2.584   | 142.97 | 3.374   | O5 [ x, -y+1/2, z-1/2 ] |
|          | C16-H16 | 0.930  | 2.425   | 116.19 | 2.956   | O5                      |
|          | N2-H2   | 0.860  | 1.873   | 159.65 | 2.696   | O5 [ x, -y+1/2, z-1/2 ] |
|          | D-H     | d(D-H) | d(H..A) | <DHA   | d(D..A) | A                       |
| <b>5</b> | N2-H2   | 0.945  | 1.719   | 170.94 | 2.656   | O5 [ x, -y, z-1/2 ]     |

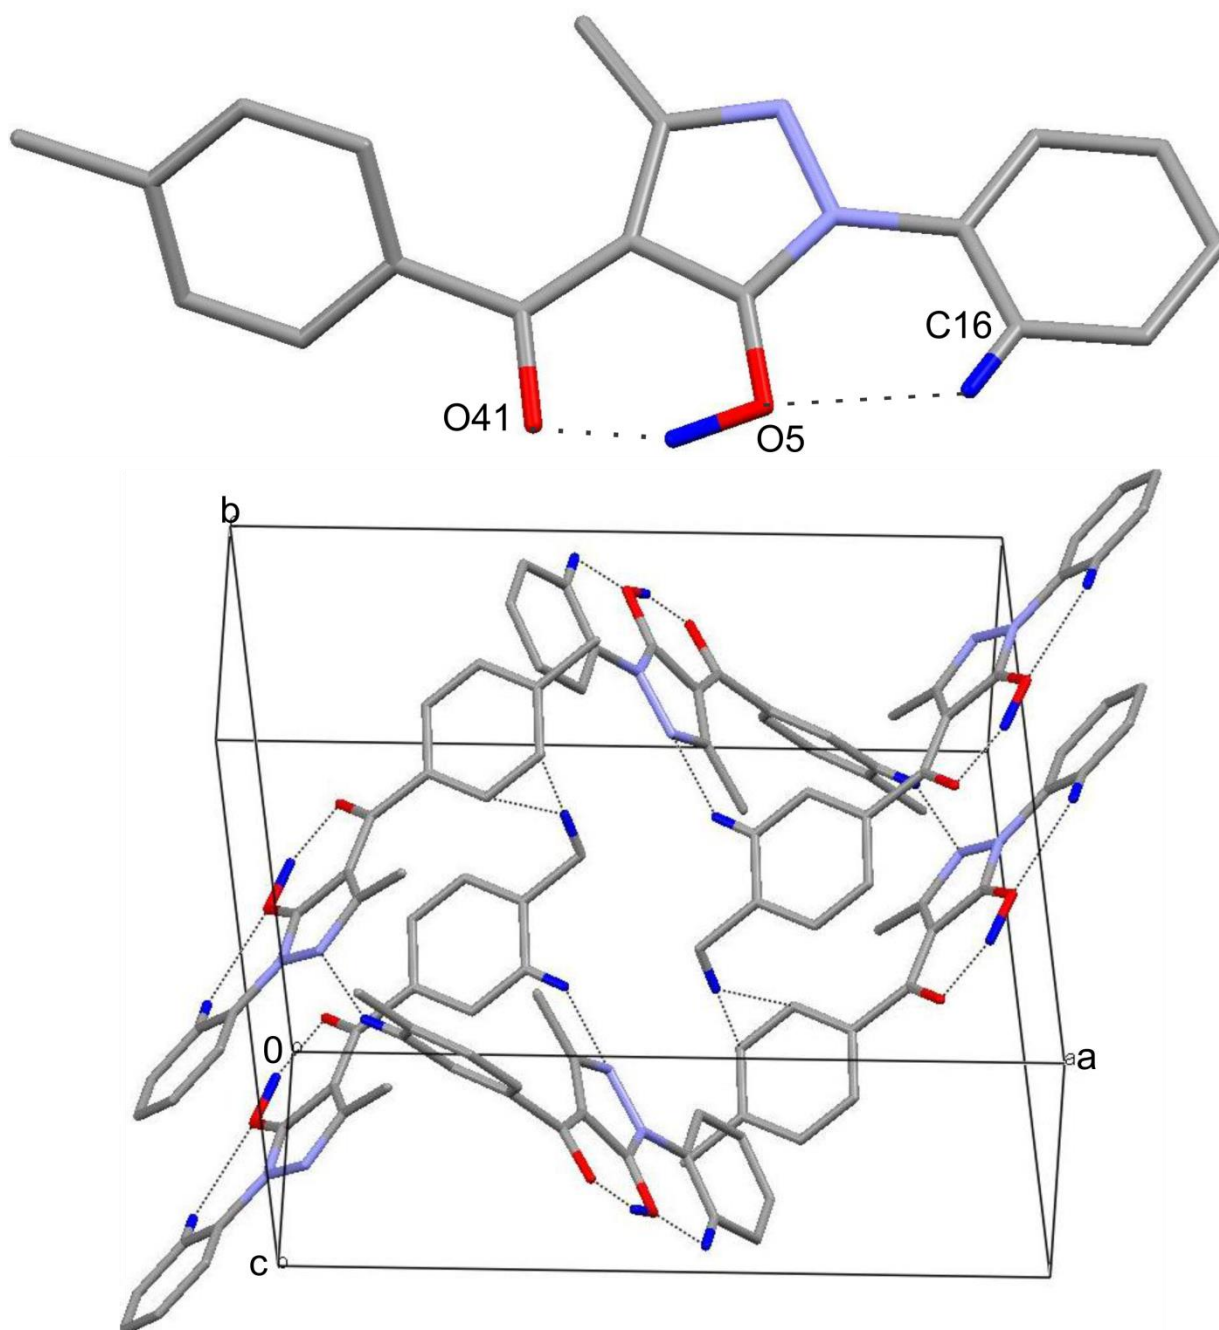

**Figure S4.** Intramolecular hydrogen bonding interactions (top) and crystal packing (bottom) of the molecules in **1**.

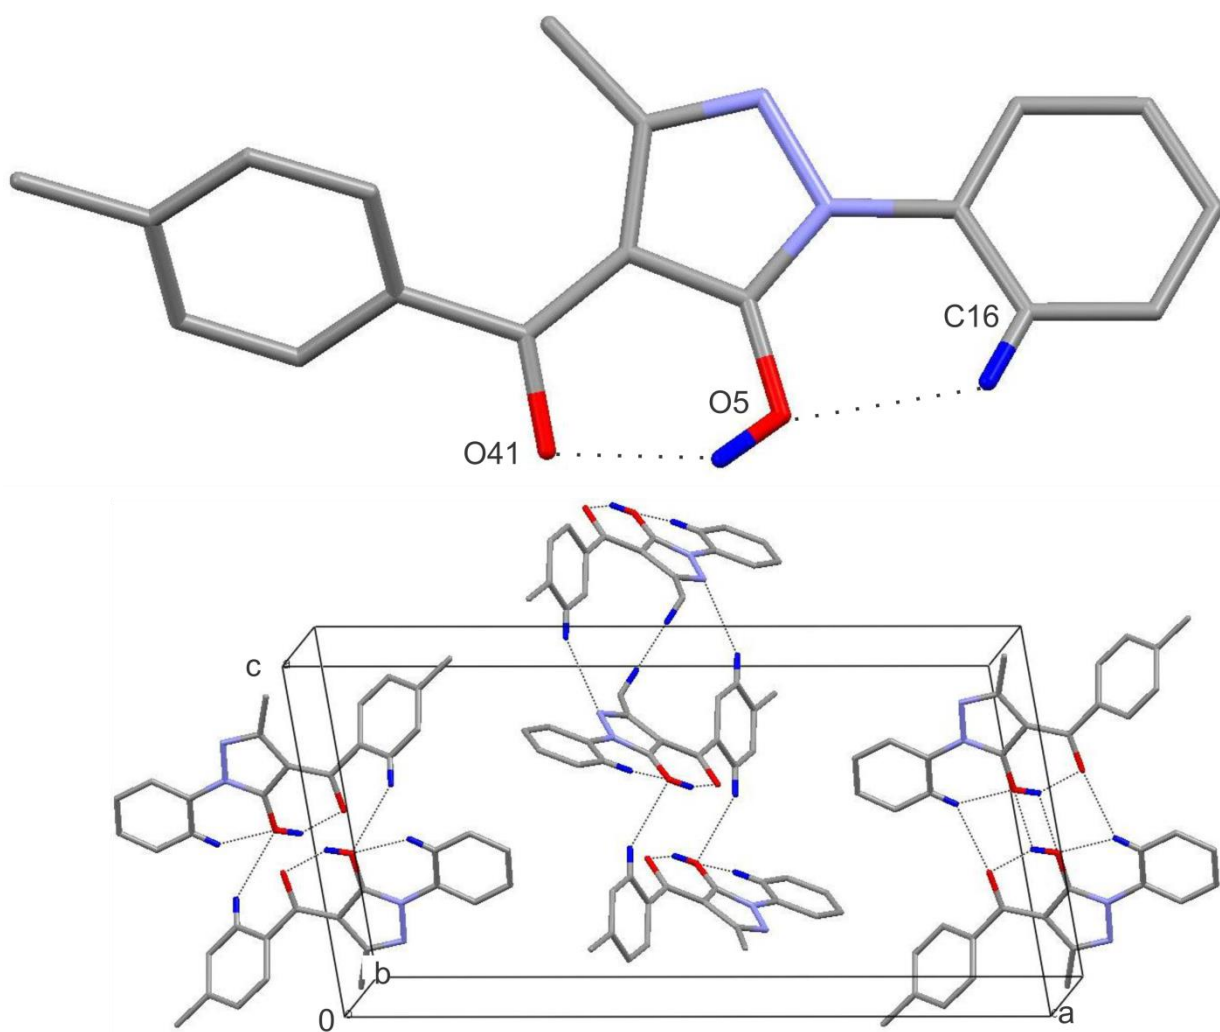

**Figure S5.** Intramolecular hydrogen bonding interactions (top) and crystal packing (bottom) of the molecules in **2**.

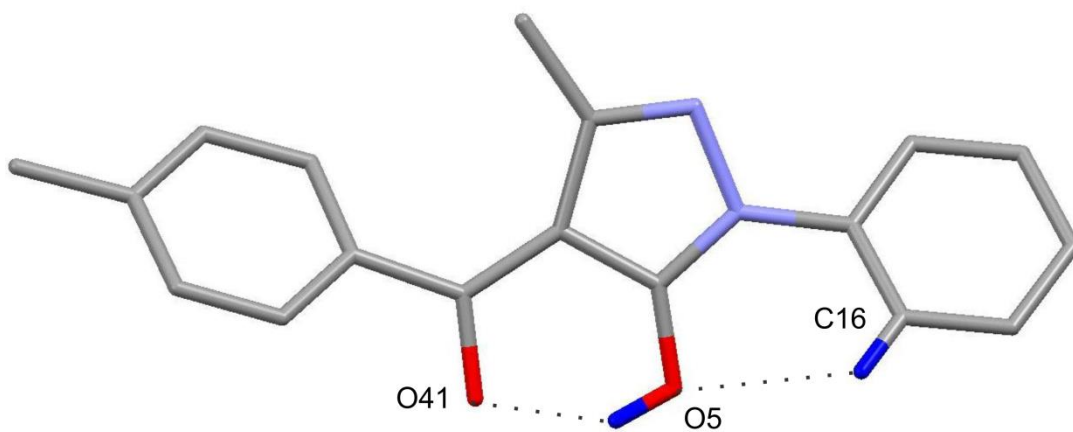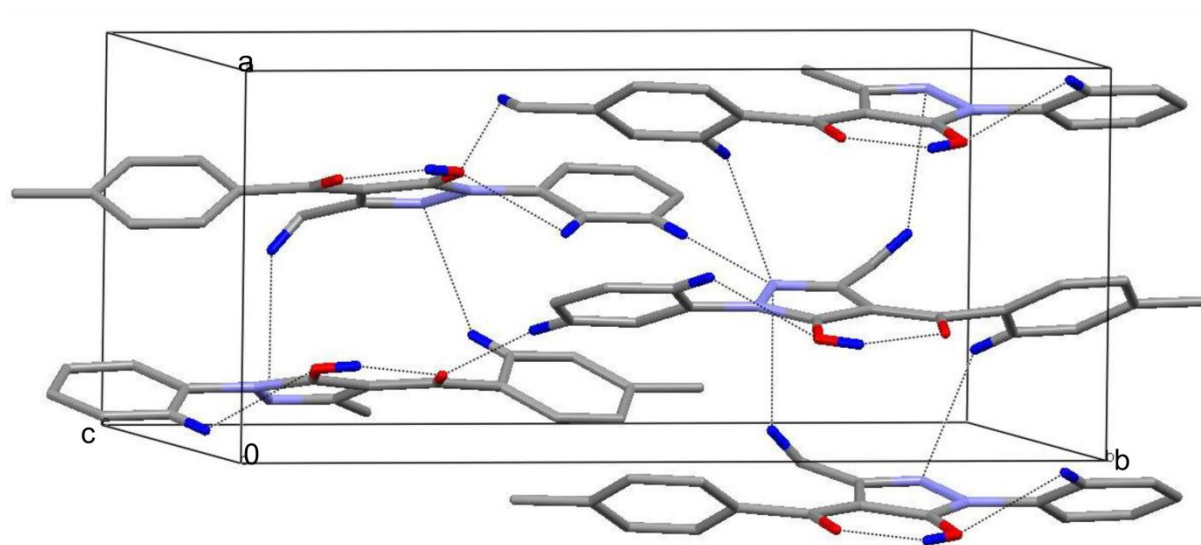

**Figure S6.** Intramolecular hydrogen bonding interactions (top) and crystal packing (bottom) of the molecules in **3**.

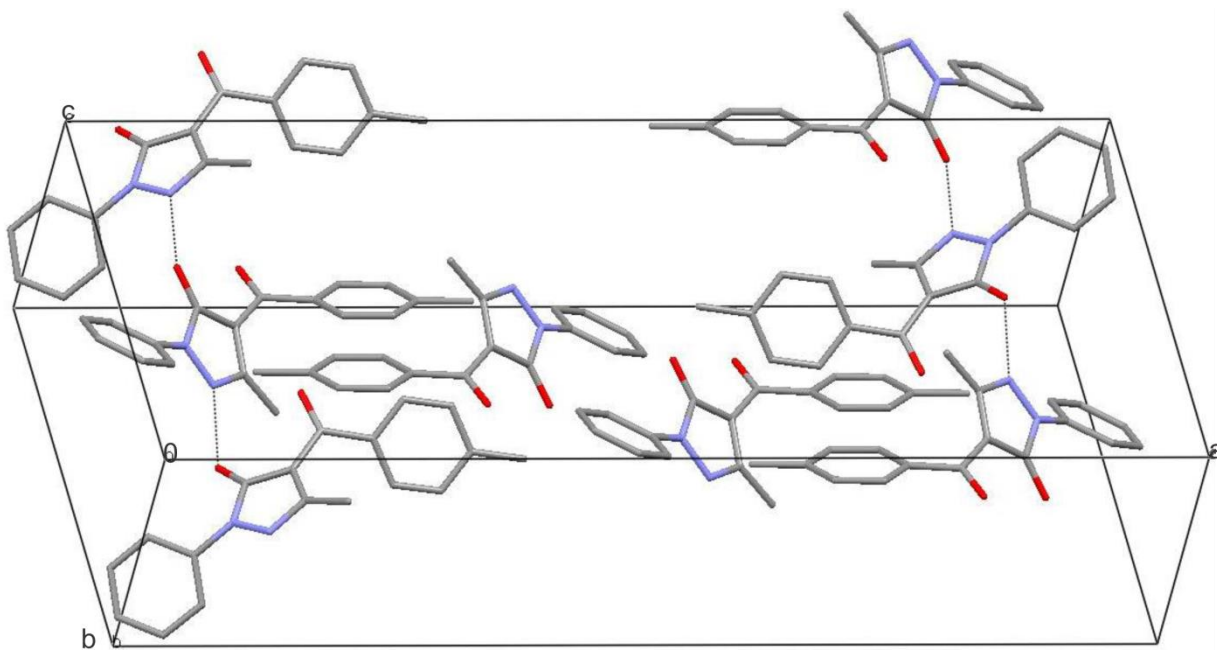

**Figure S7.** Crystal packing of the molecules in **4**.

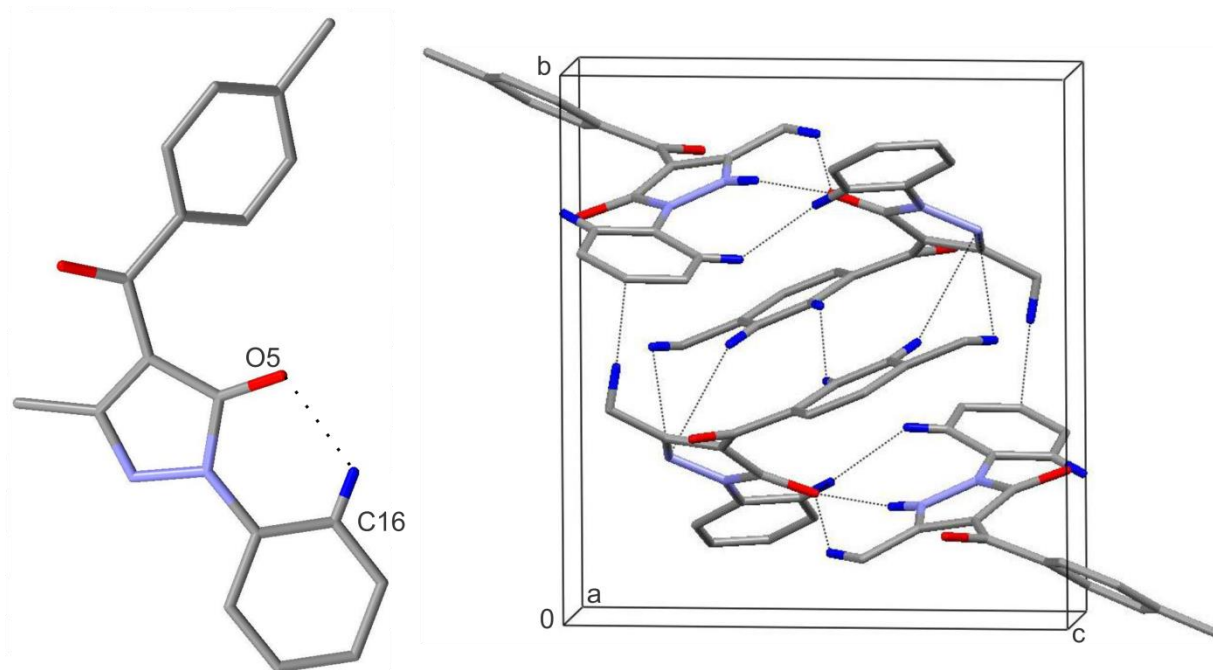

**Figure S8.** Intramolecular hydrogen bonding interactions (left) and crystal packing (right) of the molecules in **5**.



**Table S3.** Comparison of room temperature and low temperature crystal data for **1-5**.

| sample | 1             |             | 2             |            | 3             |            | 4             |            | 5             |             |
|--------|---------------|-------------|---------------|------------|---------------|------------|---------------|------------|---------------|-------------|
|        | RT            | LT          | RT            | LT         | RT            | LT         | RT            | LT         | RT            | LT          |
| TT     | 101.1-101.2°C |             | 103.9-104.0°C |            | 105.8-105.9°C |            | 126.2-126.4°C |            | 135.4-135.6°C |             |
| a      | 15.3847(5)    | 15.3484(4)  | 11.8744(7)    | 11.7774(7) | 7.6533(5)     | 7.4723(5)  | 10.966(5)     | 10.9709(4) | 29.4373(11)   | 29.4321(19) |
| b      | 5.2035(2)     | 5.12120(10) | 5.3140(5)     | 5.3159(16) | 17.3165(8)    | 17.3131(8) | 12.084(5)     | 11.8263(3) | 9.0493(4)     | 8.8489(4)   |
| c      | 18.2280(7)    | 18.0639(5)  | 23.4934(14)   | 23.349(3)  | 11.3945(5)    | 11.3273(5) | 11.968(5)     | 11.9472(4) | 11.4932(4)    | 11.4832(6)  |
| beta   | 90.913(3)     | 90.970(2)   | 97.072(5)     | 97.592(7)  | 90            | 90         | 110.14(4)     | 110.334(4) | 97.476(4)     | 97.478(5)   |
| V      | 1459.04(9)    | 1419.66(6)  | 1471.2(1)     | 1449.0(5)  | 1510.09(14)   | 1465.4(1)  | 1488.9(12)    | 1453.49(9) | 3035.6(2)     | 2965.3(3)   |
| $\rho$ | 1.331         | 1.368       | 1.320         | 1.34       | 1.286         | 1.325      | 1.304         | 1.336      | 1.279         | 1.31        |

**Table S4.** Chemical shifts in the NMR spectra of 3-methyl-4-(4-methylphenyl)-1-phenylpyrazol-5-one signals in solid state.

|                          | <b>CDCl<sub>3</sub></b> | <b>1</b>            | <b>2<sup>a</sup></b> | <b>3<sup>b</sup></b> | <b>4</b>            | <b>5</b>            |
|--------------------------|-------------------------|---------------------|----------------------|----------------------|---------------------|---------------------|
| CH <sub>3</sub> -3       | 16.02                   | 16.27               | 15.86                | 18.16                | 11.11               | 12.45               |
| CH <sub>3</sub> , Ar     | 21.68                   | 22.72               | 22.09                | 21.09                | 21.74               | 21.01               |
| CH-Ar, Ph                | 120.73                  | 117.79 <sup>c</sup> | 118.02 <sup>c</sup>  | 120.79 <sup>c</sup>  | 116.83              | 122.30              |
|                          | 126.62                  | 125.61              | 125.92               | 125.01               | 119.98              | 124.55              |
|                          | 128.17                  | 128.12              | 128.46               | 128.96 <sup>c</sup>  | 125.54              | 126.11              |
|                          | 129.08                  | 129.54 <sup>c</sup> | 129.90               | 131.04               | 127.37              | 129.24 <sup>c</sup> |
|                          | 129.13                  | 130.54              | 130.09               |                      | 130.00 <sup>c</sup> | 130.67              |
|                          |                         | 131.53              |                      |                      | 131.76              | 132.76              |
| C <sub>q</sub> -3        | 147.91                  | 145.22              | 145.52               | 146.46               | 151.09              | 146.84              |
| C <sub>q</sub> -4        | 103.53                  | 102.88              | 103.33               | 101.57               | 105.02              | 103.16              |
| C <sub>q</sub> -5        | 161.81                  | 163.13              | 162.35               | 163.28               | 158.86              | 160.12              |
| C <sub>q</sub> -O, aroyl | 191.63                  | 188.70              | 190.86               | 189.91               | 187.12              | 190.22              |
| C <sub>q</sub> -1, Ar    | 134.64                  | 134.36              | 135.03               | 131.20               | 135.64 <sup>c</sup> | 135.62 <sup>c</sup> |
| C <sub>q</sub> -1, Ph    | 137.27                  | 138.27              | 137.92               | 137.34               |                     |                     |
| C <sub>q</sub> -4, Ar    | 142.69                  | 141.59              | 141.89               | 143.79               | 144.04              | 143.49              |
| N-1                      |                         | 191.74              | 191.60               | 191.33               | 174.25              | 176.72              |
| N-2                      |                         | 277.62              | 279.55               | 284.72               | 162.66              | 167.41              |
|                          |                         |                     |                      |                      |                     |                     |

<sup>a</sup> Assigned as difference between the spectra of **1+2** mixture and pure **1**. <sup>b</sup> Mixture containing >90 % **3** according to powder XRD. <sup>c</sup> Signals with increased intensity (more than one carbon).

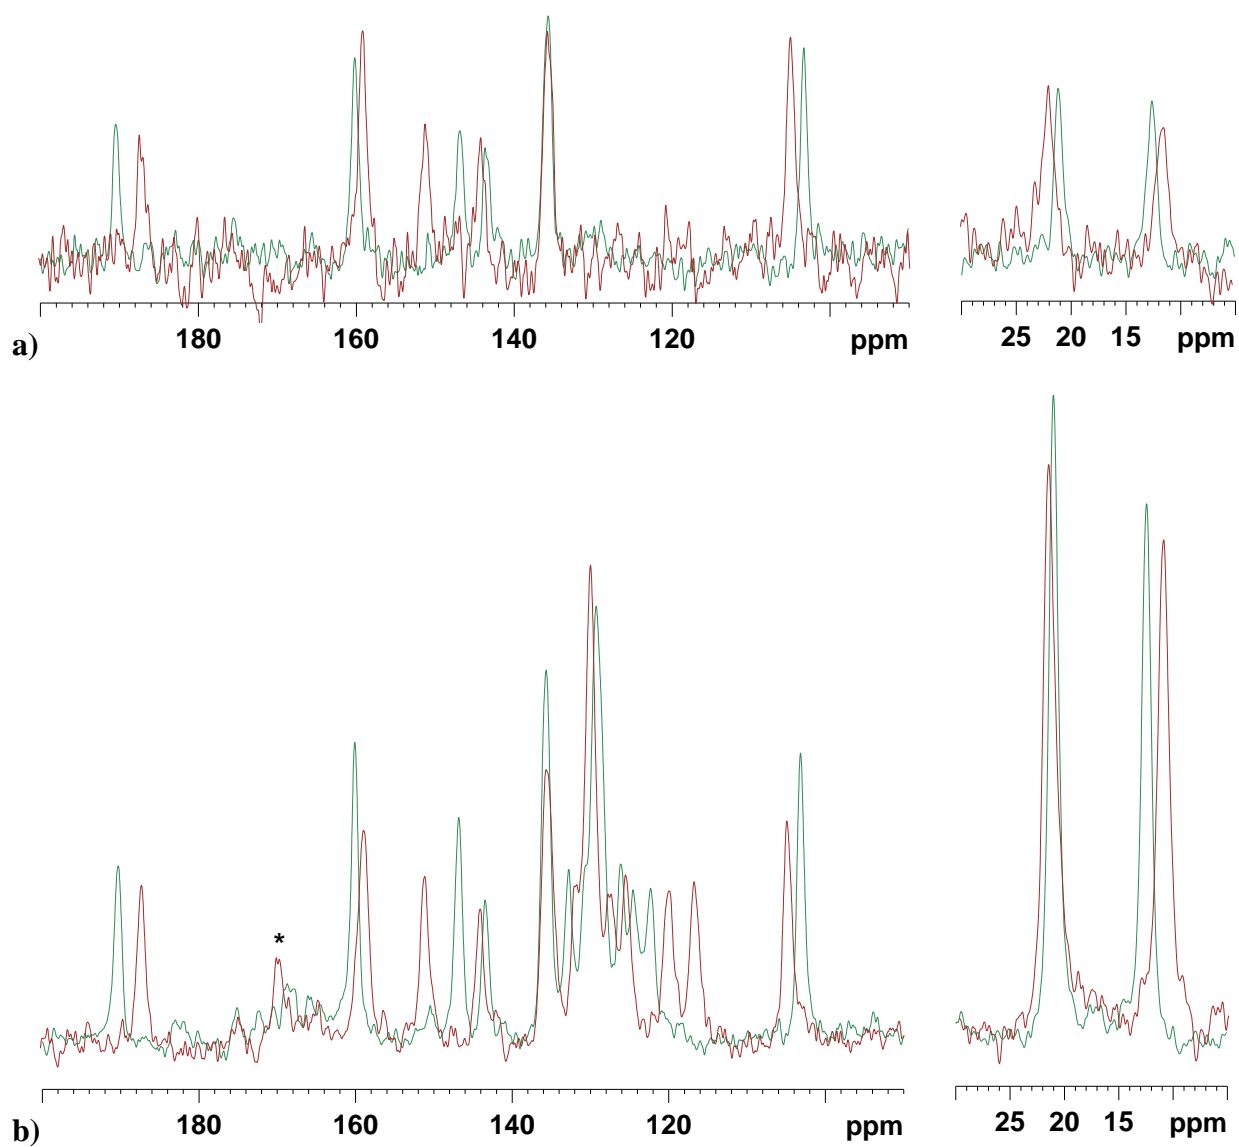

**Figure S9**  $^{13}\text{C}$  spectra of **4** (brown) and **5** (green): a) CPTOSS-NQS; b) CPTOSS. Residual spinning sideband is marked with asterisk.

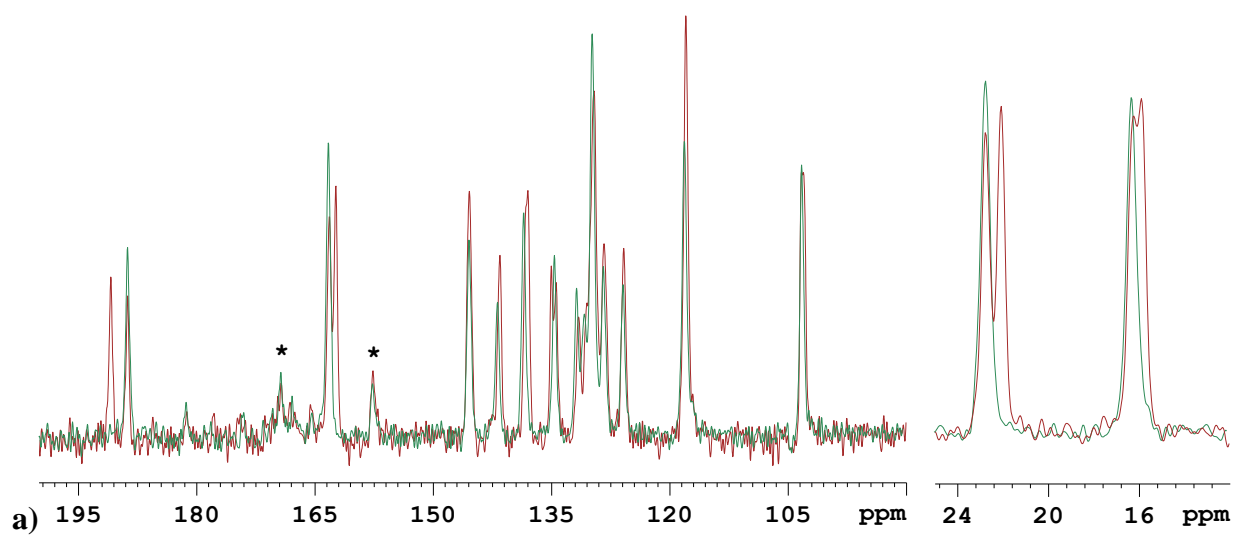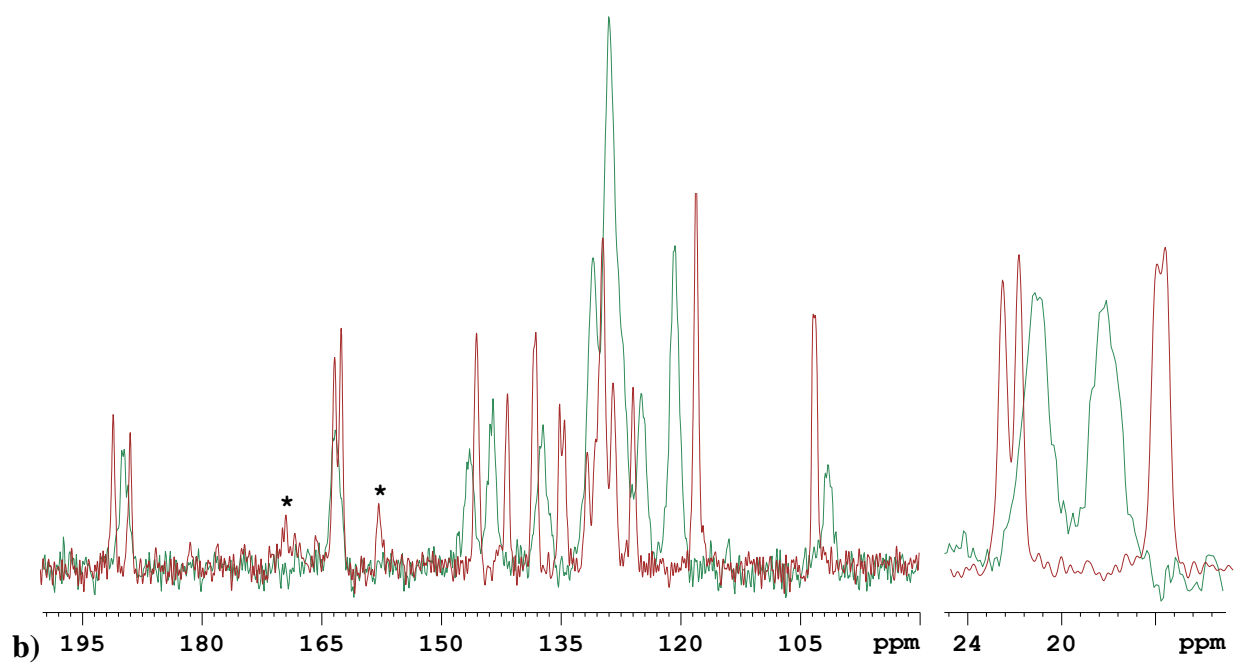

**Figure S10**  $^{13}\text{C}$  CPTOSS spectra of **1** + **2** mixture (brown) and: a) **1** (green); b) **3** (green). Residual spinning sidebands are marked with asterisks.

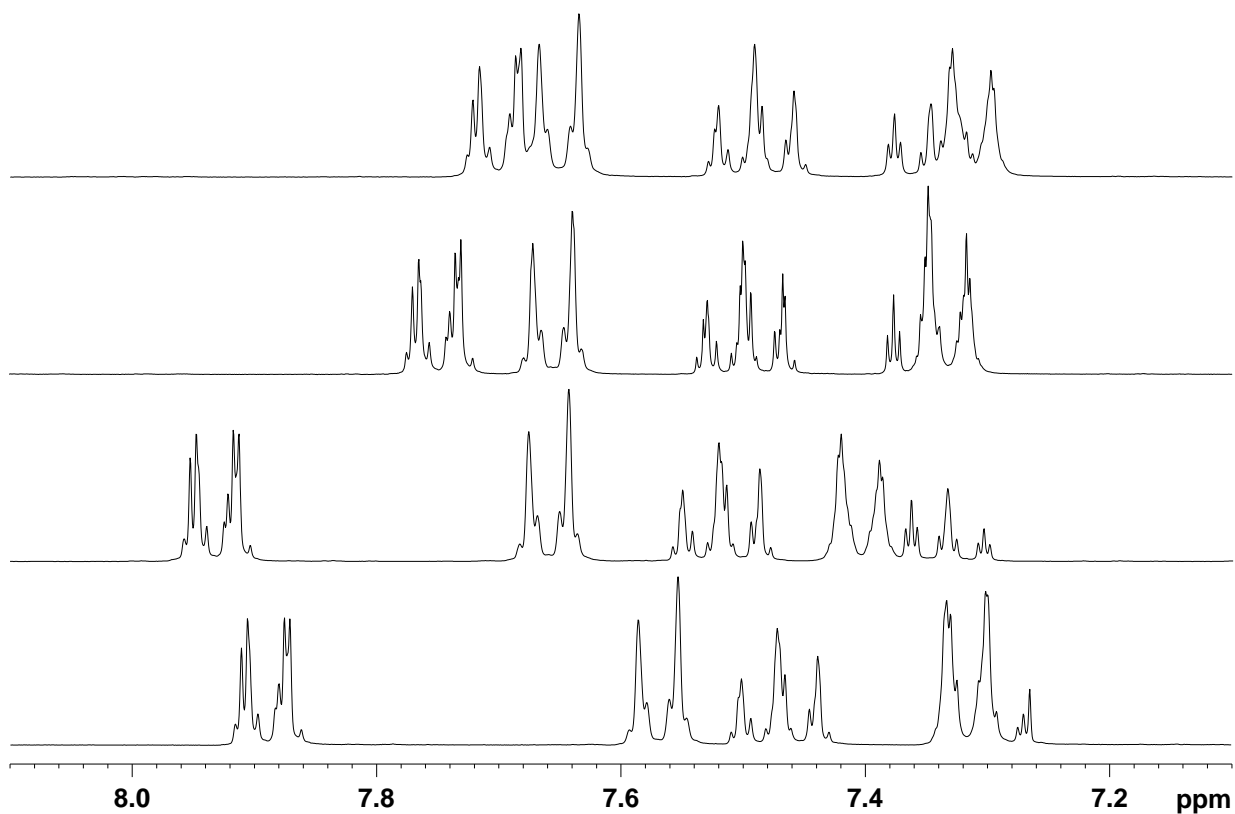

**Figure S11.** The aromatic area in  $^1\text{H}$  NMR spectra of 3-methyl-4-(4-methylphenyl)-1-phenylpyrazol-5-one in different solvents. From bottom to top:  $\text{CDCl}_3$ ,  $\text{CD}_3\text{COCD}_3$ ,  $\text{CD}_3\text{OD}:\text{CD}_3\text{COCD}_3$  5:1,  $\text{CD}_3\text{OD}$ .

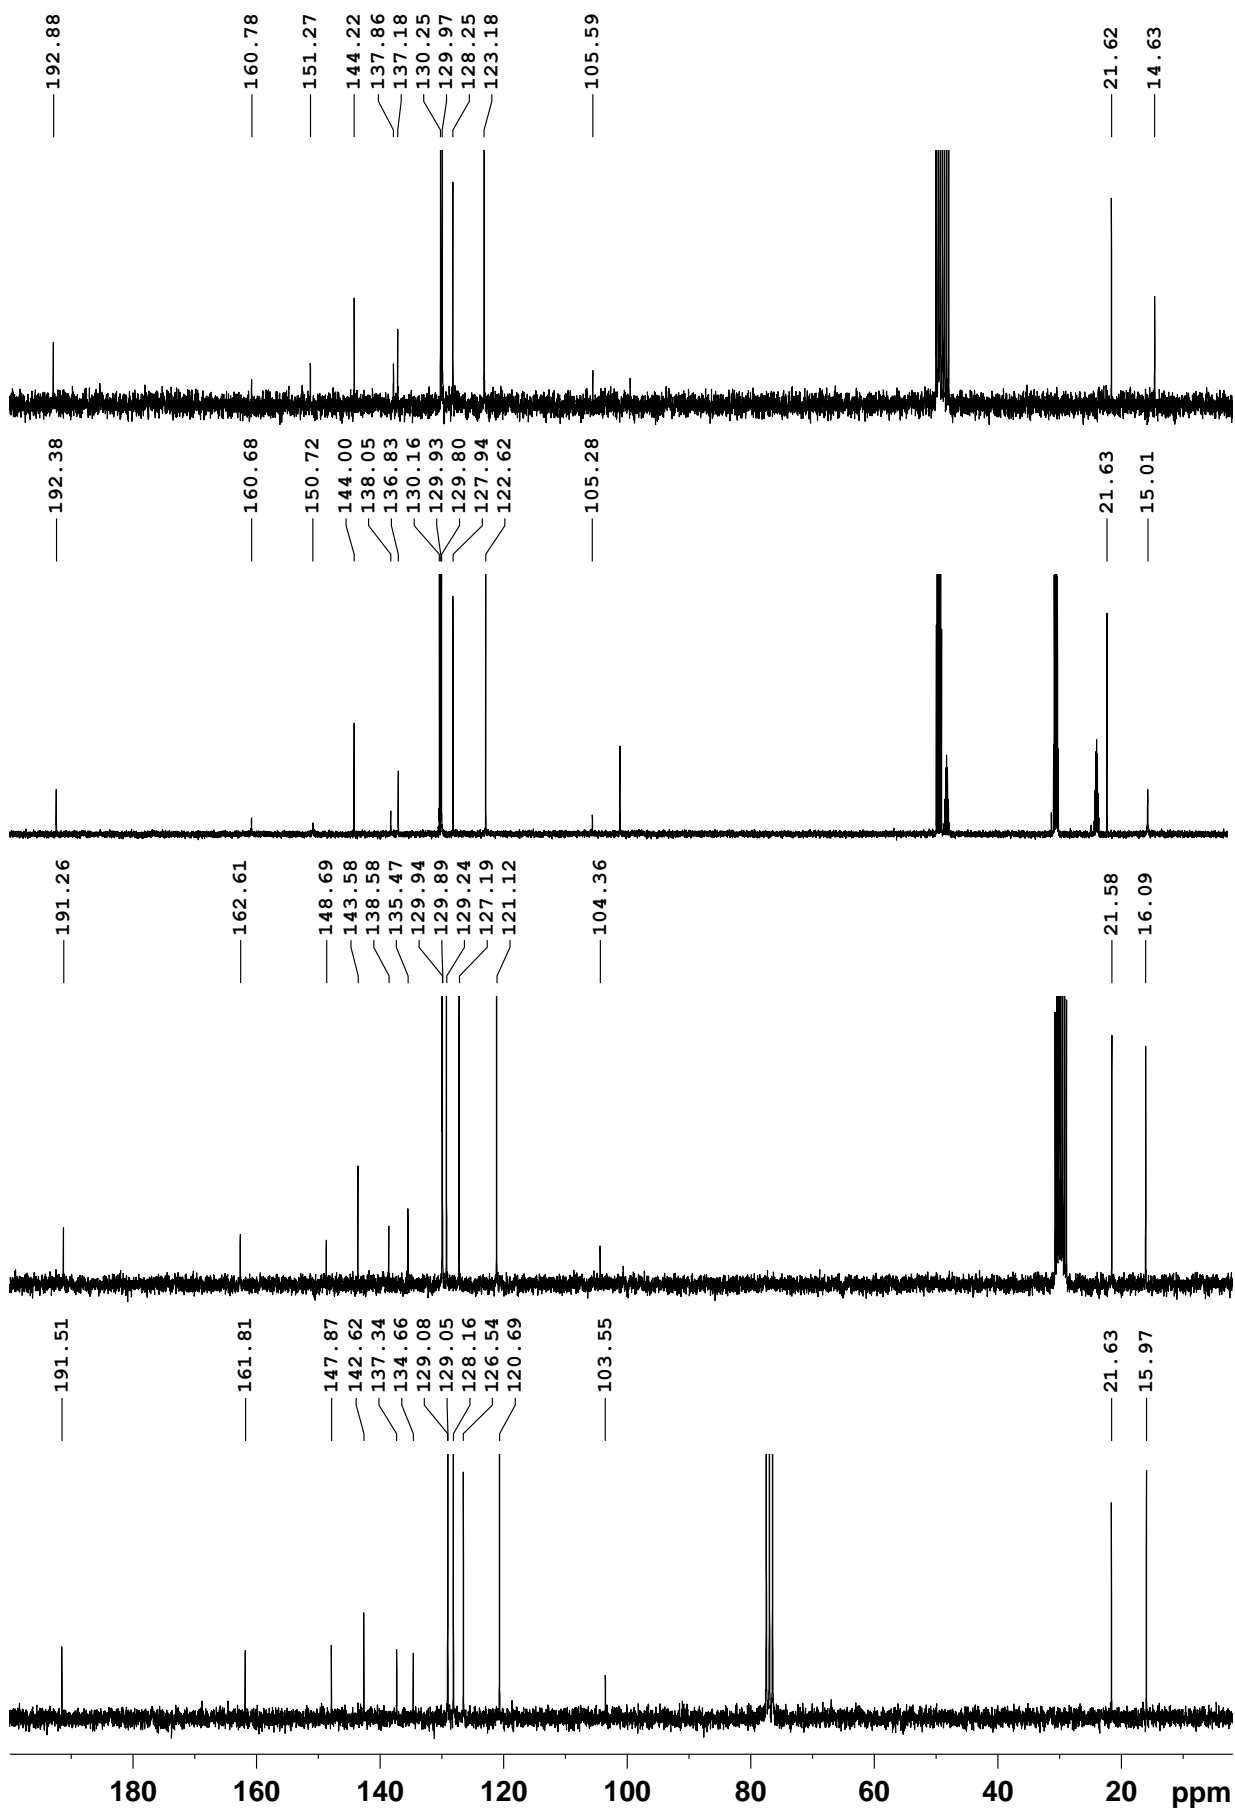

**Figure S12.** <sup>13</sup>C NMR spectra of 3-methyl-4-(4-methylphenyl)-1-phenyl-pyrazol-5-one in different solvents. From bottom to top: CDCl<sub>3</sub>, CD<sub>3</sub>COCD<sub>3</sub>, CD<sub>3</sub>OD:CD<sub>3</sub>COCD<sub>3</sub> 5:1, CD<sub>3</sub>OD.

**Table S5.** Chemical shifts in the NMR spectra of 3-methyl-4-(4-methylphenyl)-1-phenylpyrazol-5-one signals in different solvents.

|                       | CDCl <sub>3</sub> |            | CD <sub>3</sub> COCD <sub>3</sub> |            | CD <sub>3</sub> OD:<br>CD <sub>3</sub> COCD <sub>3</sub> 5:1 |            | CD <sub>3</sub> OD |            |
|-----------------------|-------------------|------------|-----------------------------------|------------|--------------------------------------------------------------|------------|--------------------|------------|
|                       | $\delta_H$        | $\delta_C$ | $\delta_H$                        | $\delta_C$ | $\delta_H$                                                   | $\delta_C$ | $\delta_H$         | $\delta_C$ |
| CH <sub>3</sub> -3    | 2.146             | 16.02      | 2.107                             | 16.09      | 2.201                                                        | 15.10      | 2.234              | 14.63      |
| CH <sub>3</sub> , Ar  | 2.457             | 21.68      | 2.451                             | 21.58      | 2.431                                                        | 21.63      | 2.426              | 21.62      |
| CH-2,6,<br>Ar         | 7.568             | 128.17     | 7.661                             | 129.24     | 7.652                                                        | 129.80     | 7.652              | 130.26     |
| CH-3,5,<br>Ar         | 7.320             | 129.08     | 7.405                             | 129.89     | 7.340                                                        | 129.93     | 7.314              | 129.97     |
| CH-2,6,<br>Ph         | 7.880             | 120.73     | 7.932                             | 121.12     | 7.771                                                        | 122.62     | 7.700              | 123.18     |
| CH-3,5,<br>Ph         | 7.473             | 129.13     | 7.519                             | 129.94     | 7.500                                                        | 130.16     | 7.492              | 129.97     |
| CH-4,<br>Ph           | 7.306             | 126.62     | 7.334                             | 127.19     | 7.349                                                        | 127.94     | 7.351              | 128.25     |
| C <sub>q</sub> -3     |                   | 147.91     |                                   | 148.69     |                                                              | 150.72     |                    | 151.27     |
| C <sub>q</sub> -4     |                   | 103.53     |                                   | 104.36     |                                                              | 105.28     |                    | 105.59     |
| C <sub>q</sub> -5     |                   | 161.81     |                                   | 162.61     |                                                              | 160.68     |                    | 160.78     |
| C=O                   |                   | 191.63     |                                   | 191.26     |                                                              | 192.38     |                    | 192.88     |
| C <sub>q</sub> -1, Ar |                   | 134.64     |                                   | 135.47     |                                                              | 136.47     |                    | 137.18     |
| C <sub>q</sub> -4, Ar |                   | 142.69     |                                   | 143.58     |                                                              | 144.00     |                    | 144.22     |
| C <sub>q</sub> -1, Ph |                   | 137.27     |                                   | 138.58     |                                                              | 138.05     |                    | 137.86     |

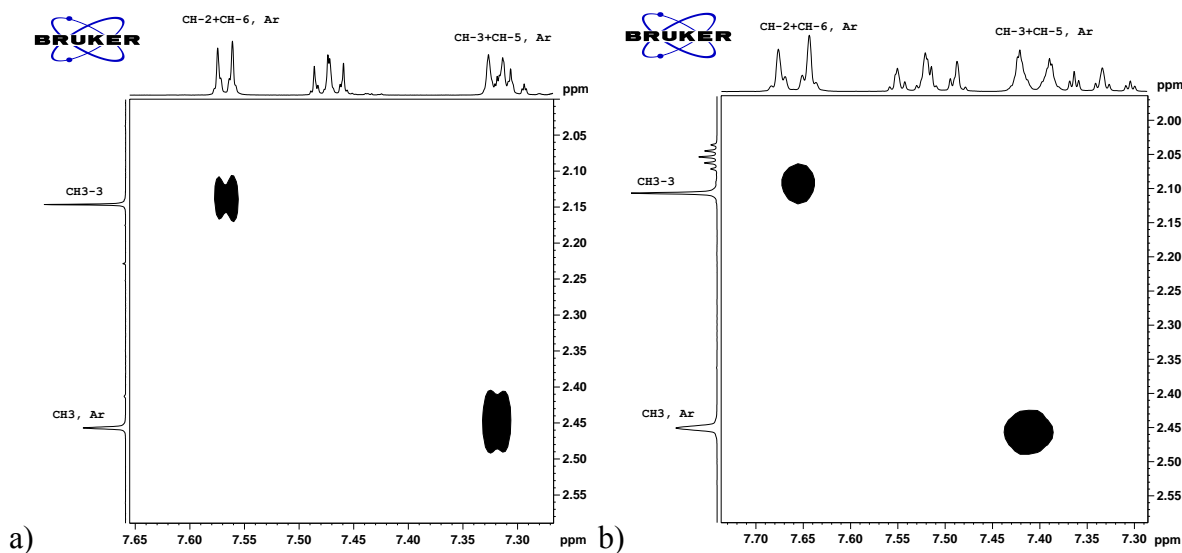

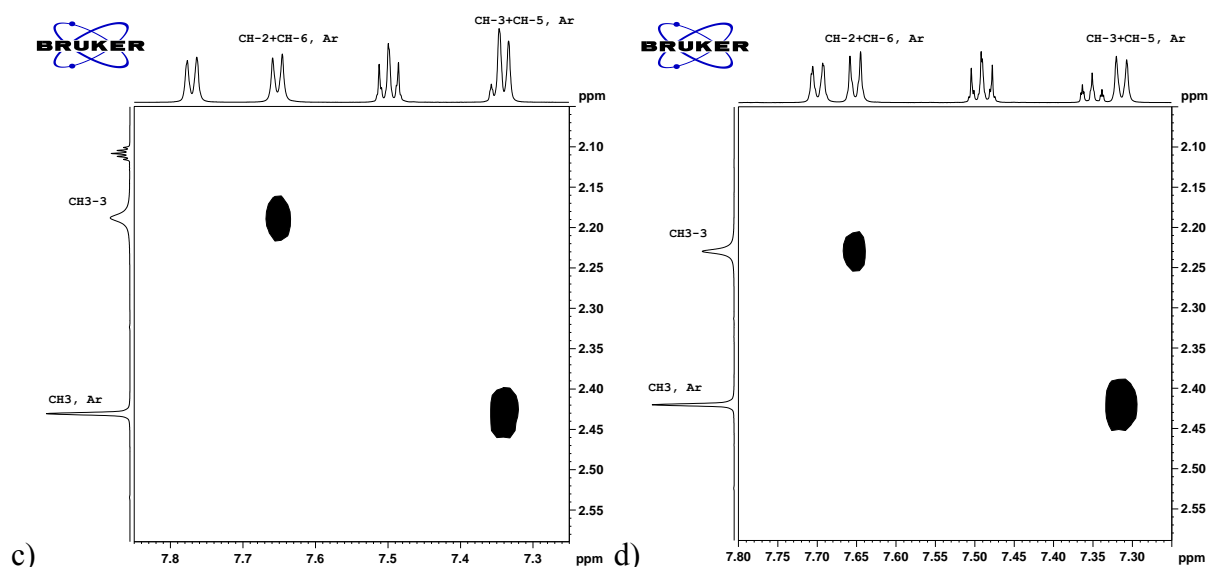

**Figure S13.** Partial  $^1\text{H}$ - $^1\text{H}$  NOESY spectra of 3-methyl-4-(4-methylphenyl)-1-phenyl-pyrazol-5-one in: a)  $\text{CDCl}_3$ ; b)  $\text{CD}_3\text{COCD}_3$ ; c)  $\text{CD}_3\text{OD}:\text{CD}_3\text{COCD}_3$  5:1; d)  $\text{CD}_3\text{OD}$ .

**Table S6.** Relative stability and major structural parameters of tautomers and isomers (M06-2X/TZVP) in methanol (PCM model).

| Structure | $\Delta E$<br>[kcal/mol] | $\Delta E+\text{ZPE}$<br>[kcal/mol] | $\Delta G$<br>[kcal/mol] | angle<br>C4-C41-<br>C42-C47 | angle<br>C3-C4-<br>C41-O41 | angle<br>C16-C11-<br>N1-C5 |
|-----------|--------------------------|-------------------------------------|--------------------------|-----------------------------|----------------------------|----------------------------|
| <b>A1</b> | 0.00                     | 0.00                                | 0.00                     | -43.1                       | 164.8                      | -34.9                      |
| <b>A2</b> | 0.22                     | 0.16                                | 0.03                     | 44.1                        | -167.1                     | -34.7                      |
| <b>B1</b> | 1.50                     | 1.16                                | 1.06                     | -45.4                       | 169.6                      | -26.2                      |
| <b>B2</b> | 1.50                     | 1.16                                | 1.06                     | 45.4                        | -169.6                     | 26.1                       |
| <b>A3</b> | 3.62                     | 3.36                                | 3.20                     | 41.9                        | 17.6                       | -40.3                      |
| <b>A4</b> | 3.75                     | 3.40                                | 3.00                     | -42.9                       | -18.2                      | -40.6                      |
| <b>D1</b> | 4.20                     | 3.78                                | 2.87                     | 30.3                        | 23.8                       | -50.1                      |
| <b>D2</b> | 4.73                     | 4.16                                | 3.49                     | -32.6                       | -22.6                      | -48.6                      |
| <b>D3</b> | 5.25                     | 4.85                                | 4.26                     | 32.3                        | -143.7                     | -46.7                      |
| <b>D4</b> | 6.02                     | 5.53                                | 5.93                     | -34.5                       | 142.4                      | -49.7                      |
| <b>C1</b> | 7.06                     | 6.17                                | 6.23                     | -5.1                        | 17.4                       | 29.5                       |
| <b>C2</b> | 7.80                     | 6.89                                | 5.78                     | -3.3                        | -115.1                     | -32.7                      |
| <b>C3</b> | 7.82                     | 7.10                                | 6.08                     | -0.3                        | 86.3                       | 27.2                       |
| <b>B4</b> | 9.72                     | 9.41                                | 9.05                     | 40.2                        | 10.2                       | 28.6                       |
| <b>B3</b> | 9.72                     | 9.41                                | 9.05                     | -40.2                       | -10.2                      | -28.6                      |
